# Supplementary material
Source: PubMed Central journal article supplement (PMC5338657)
Supplement: supp_pp.16.01803_PP2016-01196DR1_Supplemental_Table_S3_and_S4.pdf [file supp_pp.16.01803_PP2016-01196DR1_Supplemental_Table_S3_and_S4.pdf]

1 **Supplemental Table S3.** Sequences of primers used in this study.

2

| Gene         | Number | Sequence (5'-3')          | Usage   |
|--------------|--------|---------------------------|---------|
| <i>LOX1</i>  | XS234  | CTCCAACAAGACTTATCTTCCACAT | qRT-PCR |
|              | XS235  | CAAGTACAGGCCGTGGGTTC      |         |
| <i>LOX2</i>  | XS236  | TCATCAGCTTATTTCCCATTGG    | qRT-PCR |
|              | XS237  | CTTAGTAACTCTGAACAAAGACCG  |         |
| <i>LOX3</i>  | XS238  | GTCAATCACTGGTTACGGACACA   | qRT-PCR |
|              | XS239  | CACCAGCAGTGAAGCCTCCT      |         |
| <i>LOX4</i>  | XS240  | CTGCTGATCTCATCCGAAGGG     | qRT-PCR |
|              | XS241  | CTCAGTATCGGTTTGGATTAGGTT  |         |
| <i>LOX5</i>  | XS242  | AGGCATATCTTCCAAGTGAAACAC  | qRT-PCR |
|              | XS243  | CAGGACCCTTGTCAGGAGCA      |         |
| <i>LOX6</i>  | XS244  | TTCGGACAGTACCCGTTTGG      | qRT-PCR |
|              | XS245  | AGGGGAATGCGTTGAGAGC       |         |
| <i>AOS</i>   | XS1372 | ACGGTTTACCAATCGTAGGACC    | qRT-PCR |
|              | XS1373 | TTGACTCTGTACACCGTGGAGTT   |         |
| <i>AOC1</i>  | XS776  | TGGGAAATACCGAAAACCCC      | qRT-PCR |
|              | XS777  | TAAGAATTTTTGGGCTGTGTCGA   |         |
| <i>AOC2</i>  | XS779  | TTCAGCAGTGTCTCTCCAATCCA   | qRT-PCR |
|              | XS780  | GCAGTGAGGTTCTTCTTGGCAGT   |         |
| <i>AOC3</i>  | XS782  | TCGTAATCATCAATCTCACCGC    | qRT-PCR |
|              | XS783  | CTGGACCGTTAGATGAGATTCCA   |         |
| <i>AOC4</i>  | XS230  | TCCAGACCAACTAAGATCCAAGAG  | qRT-PCR |
|              | XS231  | CTGTGTAGAGTTTGTGTGAAGGG   |         |
| <i>OPR3</i>  | XS1323 | CGGATTTGGTTTCGCGGTTCAAGA  | qRT-PCR |
|              | XS1324 | TCCGTGTAGCCAACAACCTGGATCT |         |
| <i>OPCL1</i> | XS1767 | GCACCATACAAGAGGATACGAAAA  | qRT-PCR |

|                   |        |                            |           |
|-------------------|--------|----------------------------|-----------|
|                   | XS1768 | TGCCTGAAGGGTTCTTTGGTA      |           |
| <i>JAR1</i>       | XS1370 | AACGCTACTGACCCCTGAAGAAGC   | qRT-PCR   |
|                   | XS1371 | GGTGAAGTGTCACCATCAACCA     |           |
| <i>VTC1</i>       | XS2185 | CAGGCTGCATTGTTGAGTCAG      | qRT-PCR   |
|                   | XS2186 | CACATGAACATCCTCACCGAG      |           |
| <i>VTC2</i>       | XS2187 | CCGTTGTTTCGAACTACCAG       | qRT-PCR   |
|                   | XS2188 | GCTCTATAGCCTCATGACTG       |           |
| <i>VTC5</i>       | XS2630 | AGCGTCGTTGCAATCAATGT       | qRT-PCR   |
|                   | XS2631 | CTTCAGCCGCCATTTGAAGA       |           |
| <i>GSH1</i>       | XS2626 | GTGTGCCCTGCCAGCTTTCT       | qRT-PCR   |
|                   | XS2627 | CAGGACATCTTCAGCGACA        |           |
| <i>GSH2</i>       | XS2628 | CTTGGTGCGAGAAGGCGTTTA      | qRT-PCR   |
|                   | XS2629 | ACTCCAAAACCAGCTGCAACG      |           |
| <i>APX2</i>       | XS2650 | ACTCCTTGTCAGCAAACCCGAG     | qRT-PCR   |
|                   | XS2651 | CTTGATGATCCTCTCTTTCTCCCA   |           |
| <i>DHAR1</i>      | XS2644 | CTCTGACAAACCCAGTGGTTC      | qRT-PCR   |
|                   | XS2645 | CAACGATGACGTCGGAATCA       |           |
| <i>MDAR3</i>      | XS2624 | CTGAAGCCTGGTGAACCTCGC      | qRT-PCR   |
|                   | XS2625 | GGTCGGATTGACTTCGAGGTC      |           |
| <i>GRI</i>        | XS1145 | TGTAGGAGATGCCACAAACCG      | qRT-PCR   |
|                   | XS1146 | CACTACAGCTAGTGGTGGTATG     |           |
| <i>TUB3</i>       | XS1771 | GGTTGGTTTTGCTCCTCTCACC     | qRT-PCR   |
|                   | XS1772 | TAGCGTCCGTGCCTTGGGTC       |           |
| <i>VTC1pro-P1</i> | XS2685 | CAAAATGAAGGTACCTTGTCGG     | ChIP-qPCR |
|                   | XS2686 | GCTGTGAGTGAACGAACACT       |           |
| <i>VTC1pro-P2</i> | XS2687 | GAAAGATTGGTGTATAAGCGTCTACG | ChIP-qPCR |
|                   | XS2688 | CCGTTGAGAGAAAAATTGAGTGCG   |           |

|                   |        |                             |           |
|-------------------|--------|-----------------------------|-----------|
| <i>VTC1pro-P3</i> | XS2689 | ATTGTTTTGTGTCGGTTGCATC      | ChIP-qPCR |
|                   | XS2690 | TGATGCTCTAACTCCTTTTCCTG     |           |
| <i>GSH1pro-P1</i> | XS2673 | AAACGCAAGCAATTCTGCATC       | ChIP-qPCR |
|                   | XS2674 | CTCCTATGAATTATGAAGCTGTGC    |           |
| <i>GSH1pro-P2</i> | XS2675 | GGGATATTGTCAAATCCATCCCG     | ChIP-qPCR |
|                   | XS2676 | CTTAGTAGGTGGAATCAAATCCTGC   |           |
| <i>GSH1pro-P3</i> | XS2677 | GTCGACACAATCAAACCAAATAG     | ChIP-qPCR |
|                   | XS2678 | GCCTCTTACTTTTCCATTTCTCAC    |           |
| <i>VTC2pro-P1</i> | XS2691 | CGTCCCATGAATAAACACGACC      | ChIP-qPCR |
|                   | XS2692 | AGGATGGAGGCGATGAAGAG        |           |
| <i>VTC2pro-P2</i> | XS2693 | AGTGTCGGGTTTCGTTTTAGCT      | ChIP-qPCR |
|                   | XS2694 | CGTGCGGCAAAGGATTAGT         |           |
| <i>VTC5pro-P1</i> | XS2695 | CGCTACAATGGCTTGTTGCA        | ChIP-qPCR |
|                   | XS2696 | TCGCCGAGATCGCAACGA          |           |
| <i>VTC5pro-P2</i> | XS2697 | CCTCATAGCTGGTCCTCTG         | ChIP-qPCR |
|                   | XS2698 | GAGTTAACCCCTAGCTACATAACC    |           |
| <i>VTC5pro-P3</i> | XS2699 | CCACACGTCCAAATCACAACC       | ChIP-qPCR |
|                   | XS2700 | CGAGGTGGGTTTCAATCACTC       |           |
| <i>GSH2pro-P1</i> | XS2679 | CACTATTAGGCACTGAAGAACG      | ChIP-qPCR |
|                   | XS2680 | GCCAGTCGAGCTTGTAAG          |           |
| <i>GSH2pro-P2</i> | XS2681 | GACTGCAACCAAATGACAATACTG    | ChIP-qPCR |
|                   | XS2682 | GCACAAGCAACAACTTGTA ACTC    |           |
| <i>GSH2pro-P3</i> | XS2683 | GGGAGTTACAAGTTTGTTGCTTG     | ChIP-qPCR |
|                   | XS2684 | CACTCTTTGTCCACAATGTTGC      |           |
| <i>ACTIN2pro</i>  | XS2721 | CGTTTCGCTTTCCTTAGTGTTAGCT   | ChIP-qPCR |
|                   | XS2722 | AGCGAACGGATCTAGAGACTCACCTTG |           |

3

4

5 **Supplemental Table S4.** Oligonucleotide probes used in EMSA.

6

| Name                  | Sequence (5'-3')                                        |
|-----------------------|---------------------------------------------------------|
| <i>VTC1pro-EP2-F</i>  | CCCCCAAAAAAGTCAACATTCAACATGTGAATAAAA<br>ATCAATATTGGTTTC |
| <i>VTC1pro-EP2-R</i>  | GAAACCAATATTGATTTTTATTACATGTTGAATGTTG<br>ACTTTTTTGGGGG  |
| <i>mVTC1pro-EP2-F</i> | CCCCCAAAAAAGTCAACATTCAAtttttAATAAAAATC<br>AATATTGGTTTC  |
| <i>mVTC1pro-EP2-R</i> | GAAACCAATATTGATTTTTATTaaaaaTTGAATGTTGAC<br>TTTTTTGGGGG  |
| <i>GSH1pro-EP2-F</i>  | GGTGATTCATTATCTACCATTACATGTTTTTGTATCA<br>TTAAATTGTTGA   |
| <i>GSH1pro-EP2-R</i>  | TCAACAATTTAATGATACAAAAACATGTGAATGGTAG<br>ATAATGAATCACC  |
| <i>mGSH1pro-EP2-F</i> | GGTGATTCATTATCTACCATTaaaaaTTTTTGTATCATT<br>AATTGTTGA    |
| <i>mGSH1pro-EP2-R</i> | TCAACAATTTAATGATACAAAAAtttttAATGGTAGATA<br>ATGAATCACC   |

7
